# Supplementary material
Source: Research Square preprint supplement (doi:10.21203/rs.3.rs-9683637/v1)
Supplement: Supplementary file 1 [file 6e79086e47d432cda9ba942d.docx]

**Online Supporting Information A**

*Learning Stimuli Taught During Group Learning Assessment*

|  | Set A | Set B | Set C | Set D | |
| --- | --- | --- | --- | --- | --- |
|  | Crockpot | French press | Puffin | | Geyser | |
|  | Fryer | Sifter | Caribou | | Plateau | |
|  | Yacht | Mixer | Laptop | | Condor | |
|  | ATV | Crane | Blackberry | | Heron | |
|  | Jetski | Moped | Lemming | | Parakeet | |

**Online Supporting Information B**

*Order of Tact Stimuli for Each Participant*

| Assessments | Liam | Emily | Edward |
| --- | --- | --- | --- |
| Pre-Assessment 1 | Set A | Set C | Set D |
| Pre-Assessment 2 | Set B | Set A | Set C |
| Post-Assessment 1 | Set D | Set B | Set A |
| Post-Assessment 2 | Set C | Set D | Set B |
